# Supplementary material
Source: PubMed Central journal article supplement (PMC3947336)
Supplement: NIHMS534585-supplement-01.pdf [file NIHMS534585-supplement-01.pdf]

1 **Supplementary Information**

2

3 **Supplementary Figure Legends**

4

5 **Figure S1. Integration of plasmid pKR04 into the *M. smegmatis* and *M. tuberculosis***

6 **genomes.** (A) PCR analysis of the *attL* and *attR* attachment junctions (lanes 1-3, *attL*; 4-6,

7 *attR*) showing integration into the *attB* site in MsmeG\_5156. Each lane represents PCR of

8 individual transformants. (B) PCR analysis of the *attL* and *attR* attachment junctions (lanes 1-8,

9 *attL*; 9-16, *attR*) showing integration into the *attB* site in *M. tuberculosis* Rv1156. Lanes 2-8 and

10 10-16 represent PCR from individual transformants. Lanes 1 and 9 are controls using wild-type

11 *M. tuberculosis* DNA.

12

13 **Figure S2. Alignment of Peaches and Bxz2 Integrases.** The location of four domains is

14 indicated as follows: N-terminal catalytic domain, red box; Pfam07508 domain, blue box; zinc

15 finger domain, green box; coiled-coil domain purple box. The C-terminal end of the catalytic

16 domain indicated aligns with positions of proteolytic cleavage in Bxb1 Int. Vertical arrow shows

17 position of the catalytic serine residue. Predicted secondary structure elements derived from

18 PSIPRED and HHPred analysis and alignment to the LI Int structure for residues 1-310 are

19 shown; the C-terminal ~200 residues are sufficiently divergent that the secondary structure

20 features cannot be confidently predicted. Putative inter-domain linker regions are indicated.

21

22 **Figure S3. Mutations at the central dinucleotides of Bxz2 attachment sites.** *attP* and *attB*

23 share a common core of 4 bp, 5'GCTG at their centers, and strand exchange is likely to occur

24 about two of these, with T-1 and G+1 being the best candidates as they lie at the center of

25 sequence symmetries within each site. (A) Recombination of linear *attB* substrates with 60 bp

26 long *attP* mutants (as indicated) in which each position from G-4 to G+2 is substituted. Only the

27 mutations at the T-1 and G+1 positions inhibit recombination consistent with these representing  
28 the central dinucleotide about which strand exchange occurs. (B) Recombination of linear *attP*  
29 with *attB* mutant substrate (G+1C).

30

31 **Figure S4. Predicted *attP* sites of Mycobacteriophages Timshel and Benedict.** In both  
32 Timshel and Benedict *int* is transcribed leftwards and there is a short intergenic space between  
33 the 5' end of the *int* and the adjacent gene to its right that is predicted to contain the *attP* site.  
34 The sequences shown represent plausible *attP* sites identified by the presence of imperfect  
35 inverted repeats with symmetrically conserved bases shown with a line above them. The  
36 predicted central dinucleotide is indicated (↔). The translation initiation codon of the *int* gene is  
37 shown in bold.

38

39

40 Table S1. Sequences of oligonucleotides used in this study.

| <b>att site</b>      | <b>Sequence</b>                                                                                                                           |
|----------------------|-------------------------------------------------------------------------------------------------------------------------------------------|
| <i>attB</i>          | 5' CGGCGAACGCGGTCTCCATCGGGATCTGCTGATCGAGCAGCATGCCGACCAGAAGCGCGA 3'<br>5' TCGCGCTTCTGGTTCGGCATGCTGCTCGATCAGCAGATCCCGATGGAGACCGCGTTCGCCG 3' |
| B half site          | 5' GCGAGCTTCTTGGGCCCGGCGAACGCGGTCTCCATCGGGATCTGCTGATC 3'<br>5' GATCAGCAGATCCCGATGGAGACCGCGTTCGCCGGGCCAAGAAGCTCGC 3'                       |
| B' half site         | 5' TGCTGATCGAGCAGCATGCCGACCAGAAGCGCGAACGGGTGGACTCCAA 3'<br>5' TTGGAGTCCAACCCGTTTCGCGCTTCTGGTTCGGCATGCTGCTCGATCAGCA 3'                     |
| Bxz2 <i>attP</i>     | 5' GCCATAACCGCAAGTGTACATCCCTCGGCTGGCCGAGACAAGTACAGTTGCGACAGACTG 3'<br>5' CAGTCTGTTCGCAACTGTACTTGTCTCGGCCAGCCGAGGGATGTACACTTGGCGTTATGGC 3' |
| Bxz2 P half-site     | 5' GGCTCTTAGCGGCTGTGCCATAACCGCAAGTGTACATCCCTCGGCTGGCC 3'<br>5' GGCCAGCCGAGGGATGTACACTTGGCGTTATGGCACAGCCGCTAAGAGCC 3'                      |
| Bxz2 P' half-site    | 5' GGCTGGCCGAGACAAGTACAGTTGCGACAGACTGTCTTCGAGCTCAGAC 3'<br>5' GTCTGAGCTCGGAAGACAGTCTGTTCGCAACTGTACTTGTCTCGGCCAGCC 3'                      |
| Bxz2 <i>attL</i>     | 5' CGGCGAACGCGGTCTCCATCGGGATCTGCTGGCCGAGACAAGTACAGTTGCGACAGACTG 3'<br>5' CAGTCTGTTCGCAACTGTACTTGTCTCGGCCAGCAGATCCCGATGGAGACCGCGTTCGCCG 3' |
| Bxz2 <i>attR</i>     | 5' GCCATAACCGCAAGTGTACATCCCTCGGCTGATCGAGCAGCATGCCGACCAGAAGCGCGA 3'<br>5' TCGCGCTTCTGGTTCGGCATGCTGCTCGATCAGCCGAGGGATGTACACTTGGCGTTATGGC 3' |
| Peaches <i>attP</i>  | 5' GGCATAGTTTCCAATGTTACAGGAAGTCTGGCAGAATCCAACACATTGGAAGTTCGATGA 3'<br>5' TCATCGACTTCCAATGTGTTGGATTCTGCCAGCAGTTCTGTAACATTGGAAGTTCGATGA 3'  |
| Peaches <i>attL</i>  | 5' CGGCGAACGCGGTCTCCATCGGGATCTGCTGGCAGAATCCAACACATTGGAAGTTCGATGA 3'<br>5' TCATCGACTTCCAATGTGTTGGATTCTGCCAGCAGATCCCGATGGAGACCGCGTTCGCCG 3' |
| Peaches <i>attR</i>  | 5' GGCATAGTTTCCAATGTTACAGGAAGTCTGATCGAGCAGCATGCCGACCAGAAGCGCGA 3'<br>5' TCGCGCTTCTGGTTCGGCATGCTGCTCGATCAGCAGTTCTGTAACATTGGAAGTTCGATGA 3'  |
| Peaches P half-site  | 5' GGCTCTTAGCGGTTGTGGCATAAGTTTCCAATGTTACAGGAAGTCTGGCA 3'<br>5' TGCCAGCAGTTCTGTAACATTGGAAGTTCGATGAGAAAGGACCCCTCAC 3'                       |
| Peaches P' half-site | 5' CTGCTGGCAGAATCCAACACATTGGAAGTTCGATGAGAAAGGACCCCTCAC 3'<br>5' GTGAGGGGTCTTTCTCATCGACTTCCAATGTGTTGGATTCTGCCAGCAG 3'                      |
| Hybrid-1             | 5' GCCATAACCGCAAGTGTACATCCCTCGGCTGGCAGAATCCAACACATTGGAAGTTCGATGA 3'<br>5' TCATCGACTTCCAATGTGTTGGATTCTGCCAGCCGAGGGATGTACACTTGGCGTTATGGC 3' |
| Hybrid-2             | 5' GGCATAGTTTCCAATGTTACAGGAAGTCTGGCCGAGACAAGTACAGTTGCGACAGACTG 3'<br>5' CAGTCTGTTCGCAACTGTACTTGTCTCGGCCAGCAGTTCTGTAACATTGGAAGTTCGATGA 3'  |
| pKR04 For primer     | 5' AAAAAACATATGGGGTATGGCACCCGGATTTGACAT                                                                                                   |
| pKR04 rev primer     | 5' TTTTTTCATATGTGACTGGGGATAGCATCTGCAC                                                                                                     |

41

42

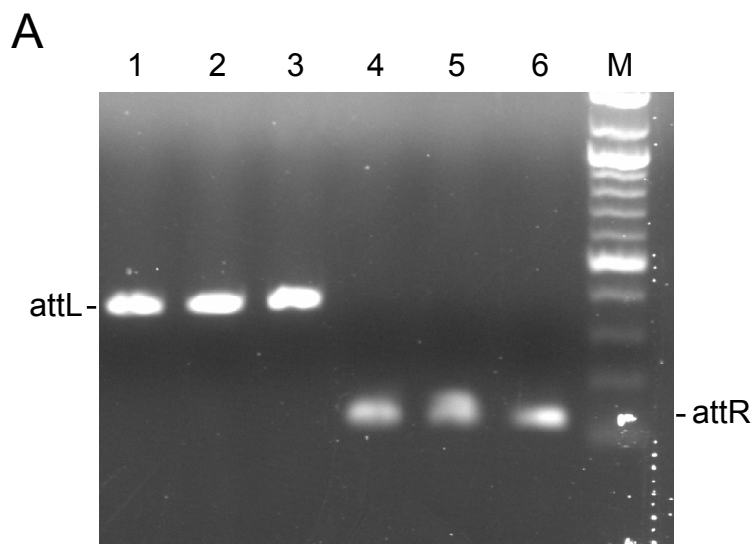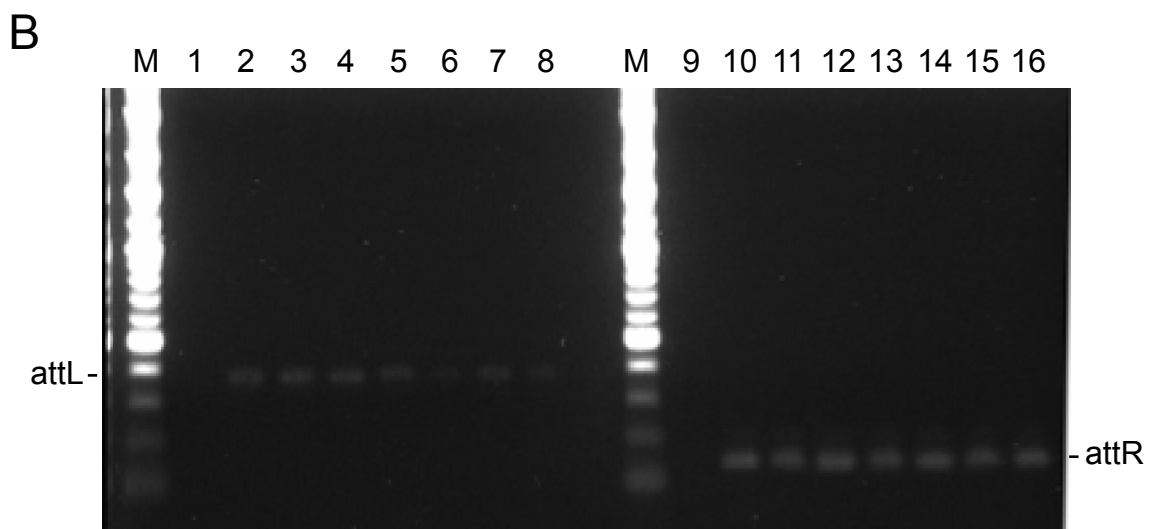

Figure S1



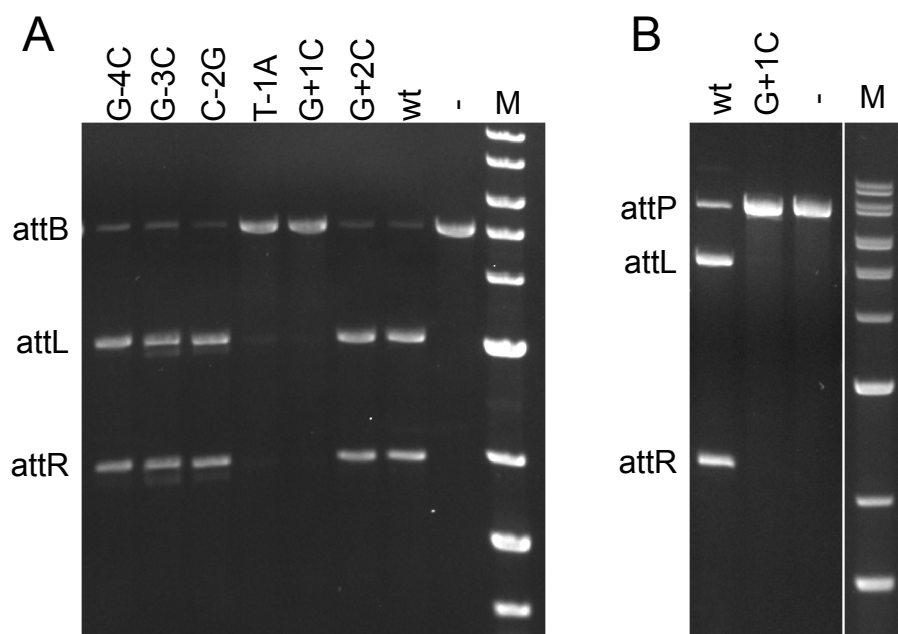

Figure S3

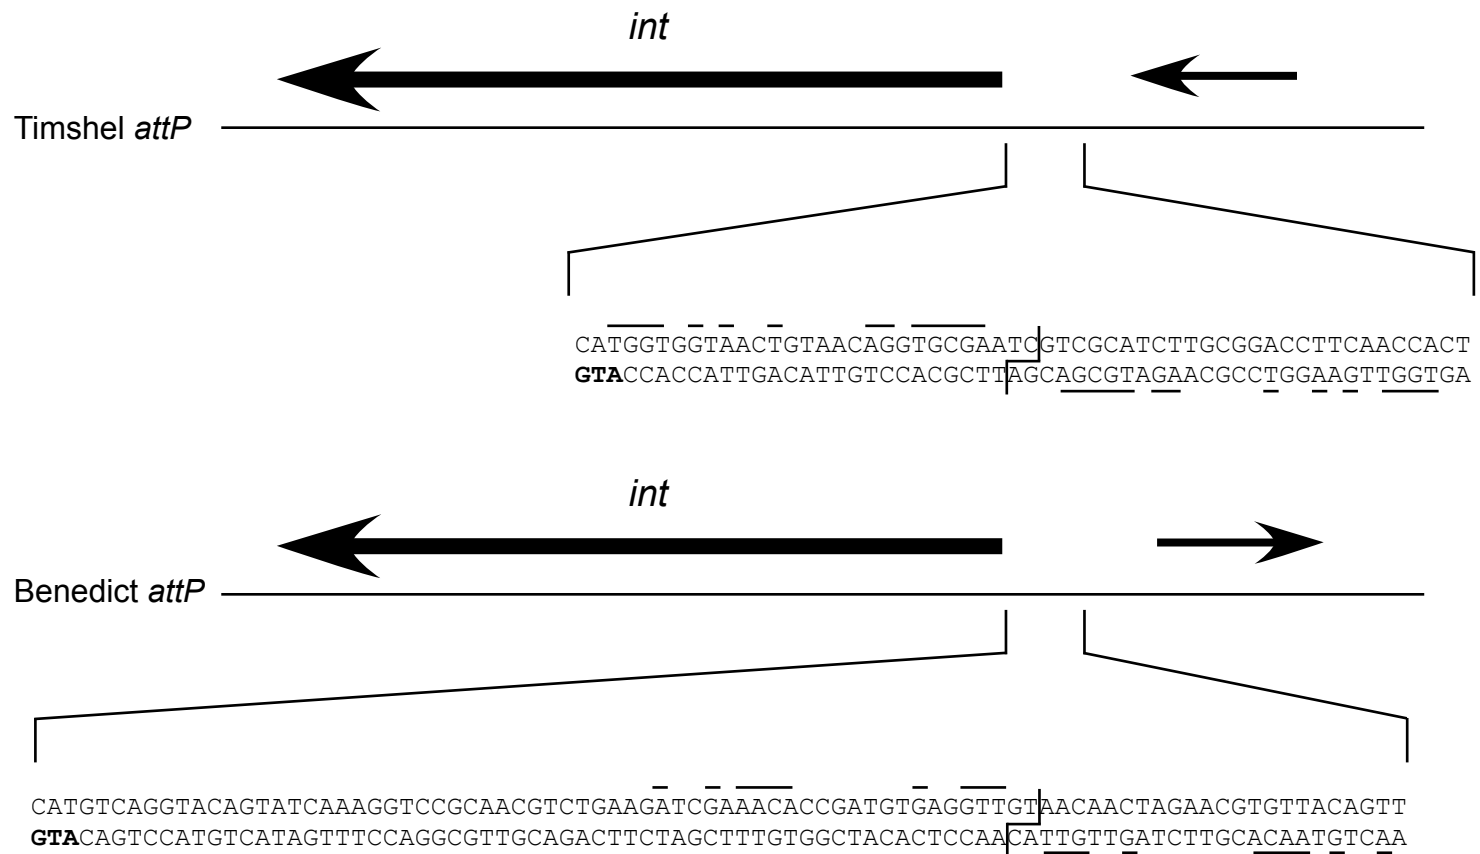

Figure S4
